# Supplementary material for: The prevalence and antifolate drug resistance profiles of Plasmodium falciparum in study participants randomized to discontinue or continue cotrimoxazole prophylaxis
Source: PubMed Central journal article supplement (PMC6445470; doi:10.1371/journal.pntd.0007223), 2019-03-21
Supplement: pntd.0007223.s001.pdf [file pntd.0007223.s001.pdf]

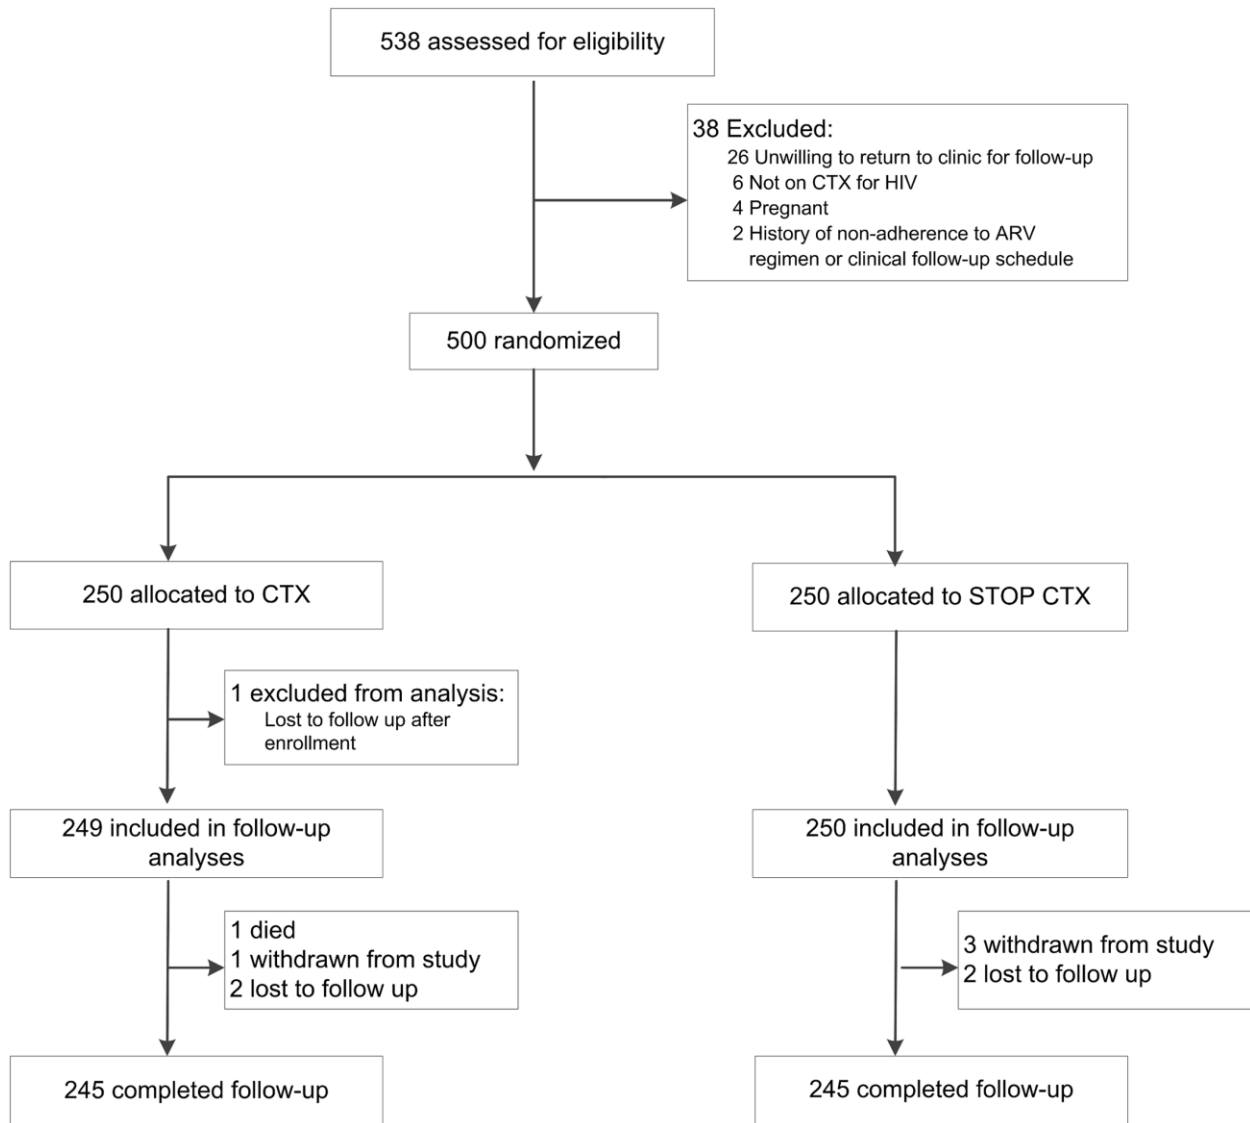

**Figure S1. Trial profile.**

Consort figure from Polyak et al., (Ref: 16) showing study retention. A total of 490 participants (98%) were retained to the end of scheduled follow-up. Participants randomized to the CTX continuation arm self-reported that they took CTX every day in the past week at 90.5% of follow-up visits.
